1 **Genetic Identification of Novel Separase regulators in**  
2 *Caenorhabditis elegans*

3 **Michael Melesse†, Dillon E. Sloan†, Joseph T. Benthall†, Quincey Caylor†, Krishen Gosine†, Xiaofei Bai† and**  
4 **Joshua N. Bembenek†**  
5

6 **AUTHOR AFFILIATIONS**

7 †Department of Biochemistry, Cellular and Molecular Biology, University of Tennessee,  
8 Knoxville, TN  
9

10 Running title: Novel regulators of *C. elegans* Separase

11 Keywords: Separase, PPH-5, HSP-90, Suppressors, *C. elegans*

12 Corresponding Author:

13 Joshua N. Bembenek

14 1414 Cumberland Ave.

15 C211 Walters Life Sciences Building

16 Knoxville, TN 37996

17 (865)-974-4085

18 [bembenek@utk.edu](mailto:bembenek@utk.edu)

19

## ABSTRACT

20   Separase is a highly conserved protease required for chromosome segregation. Although  
21   observations that separase also regulates membrane trafficking events have been made, it is still  
22   not clear how separase achieves this function. Here we present an extensive ENU mutagenesis  
23   suppressor screen aimed at identifying suppressors of *sep-1(e2406)*, a temperature sensitive  
24   maternal effect embryonic lethal separase mutant. We screened nearly a million haploid  
25   genomes, and isolated sixty-eight suppressed lines. We identified fourteen independent  
26   intragenic *sep-1(e2406)* suppressed lines. These intragenic alleles map to seven SEP-1 residues  
27   within the N-terminus, compensating for the original mutation within the poorly conserved N-  
28   terminal domain. Interestingly, 47 of the suppressed lines have novel mutations throughout the  
29   entire coding region of the *pph-5* phosphatase, indicating that this is an important regulator of  
30   separase. We also found that a mutation near the MEEVD motif of HSP-90, which binds and  
31   activates PPH-5, also rescues *sep-1(e2406)* mutants. Finally, we identified six potentially novel  
32   suppressor lines that fall into five complementation groups. These new alleles provide the  
33   opportunity to more exhaustively investigate the regulation and function of separase.

## 34 INTRODUCTION

35           Separase is a highly conserved cysteine protease required for proper chromosome  
36 segregation during anaphase of both meiotic and mitotic stages of cell division ([Peters et al.](#)  
37 [2008](#)). Separase proteolytic activity is inhibited during interphase and early mitosis by its  
38 pseudosubstrate inhibitor, securin ([Nasmyth, K. A., 2002](#)). The protease activity of separase is  
39 critical for the cleavage of kleisin subunits of the cohesin complex ([Uhlmann et al. 2000](#), [Hauf et](#)  
40 [al. 2001](#)). Cohesin holds sister chromatids together prior to their proper attachment to spindles  
41 and alignment on the metaphase plate preceding anaphase ([Nasmyth and Haering, 2009](#)).  
42 Separase has also been implicated in various cell cycle regulatory functions. In budding yeast,  
43 separase stabilizes the anaphase spindle by cleaving the spindle and kinetochore associated  
44 protein, Slk19 ([Sullivan et al. 2001](#)). It is also involved in the release of the essential mitotic  
45 phosphatase Cdc14 in budding yeast ([Sullivan and Uhlmann 2003](#)). In mammalian cells,  
46 separase licenses centriole duplication ([Baskerville et al. 2008](#)) and a domain within its N-  
47 terminus binds and inhibits the Cyclin B-Cdk1 complex ([Gorr et al. 2005](#)). In mammalian cells,  
48 separase has also been shown to associate with membranes and its depletion is associated with  
49 swelling of the trans-golgi network and decreased constitutive protein secretion ([Bacac et al.](#)  
50 [2011](#)). In *Arabidopsis*, separase mutant cells display mitotic failure due to defects in vesicle  
51 trafficking along microtubules, which is critical for synthesis of a cell plate during cytokinesis  
52 ([Moschou et al. 2016](#)). Therefore, there are numerous functions of separase during the cell cycle,  
53 and how each are regulated has not been fully elucidated.

54           In *Caenorhabditis elegans*, separase is known to regulate multiple cell cycle events  
55 beyond its chromosome segregation functions ([Bembenek et al. 2007, 2010](#)). It has been  
56 demonstrated to regulate cell cycle related membrane transport events critical for both

57 cytokinesis and embryonic development. During meiosis, the *C. elegans* eggshell is formed  
58 around a fertilized embryo to prevent polyspermy and provide both mechanical as well as  
59 osmotic protection for the developing embryo (Olson et al. 2012; Stein and Golden 2015).  
60 Formation of the eggshell is dependent on the progression of the embryonic cell cycle and  
61 requires cargo released via cortical granule exocytosis (CGE), which occurs during anaphase I  
62 (Bembenek et al. 2007). Importantly, separase localizes to cortical granules and is required for  
63 their exocytosis during anaphase, independently of chromosome segregation.

64         Various separase mutants have been identified in budding yeast, mouse and human cells.  
65 Many of these mutants compromise the protease function of separase and directly affect its role  
66 during chromosome segregation. Interestingly, the hypomorphic separase mutant (*sep-1(e2406)*),  
67 originally isolated by David Livingstone in a screen for temperature sensitive mutants defective  
68 in cell division (Siomos et al. 2001), is a partial separation of function allele. *sep-1(e2406)* is a  
69 C450Y missense mutation in the N-terminal region of separase and has minimal effect on the  
70 chromosomal segregation role of separase but significantly diminishes cortical granule  
71 exocytosis. In embryos, SEP-1(e2406) can be observed on the spindle, but shows reduced  
72 localization to cortical granules and results in a lower number of exocytic events. Another  
73 separase mutant (*sep-1(ax110)*) is a non-conditional allele that also results in minimal  
74 chromosome segregation defects and leads to cytokinesis failure (Richie et al. 2011). This allele  
75 is a missense mutation (H738P) in the protease domain of SEP-1 that is maternal effect  
76 embryonic lethal. These alleles potentially provide a unique opportunity to learn more about the  
77 membrane trafficking functions of separase.

78         Previous attempts to learn more about separase regulation used *sep-1(e2406)* to identify  
79 the PPH-5 phosphatase as a suppressor of separase (Richie et al. 2011). This effort screened 1.0

80 X 10<sup>5</sup> genomes and identified three suppressors including one *pph-5* allele, *pph-5(av101)*, an  
81 intragenic *sep-1* (L556F) mutant and another mutant that maps to LG III. Mutations in *pph-5* as  
82 well as RNAi mediated knockdown rescues *sep-1(e2406)* (Richie et al. 2011), suggesting that  
83 *pph-5* is a negative regulator of separase function. The *pph-5(av101)* suppressor allele, which is a  
84 missense mutation (P375Q), does not suppress *sep-1(e2406)* at 24° but was effective in  
85 suppressing *sep-1(ax110)* at all tested temperatures (Richie et al. 2011). This observation  
86 suggests that there might be underlying differences in the effects of these SEP-1 mutations on  
87 separase function.

88 PPH-5 is a widely conserved phosphatase that contains N-terminal tetratricopeptide  
89 repeats (TPRs) and a C-terminal phosphatase domain. PP5 (human PPH-5), originally identified  
90 as a regulator of a variety of cellular signaling pathways including glucocorticoid receptor  
91 signaling, displays low phosphatase activity when purified due to the autoinhibitory role of its  
92 TPR domain (Chen et al. 1996). Interestingly, PP5 binds CDC16 and CDC27, components of the  
93 Anaphase Promoting Complex/Cyclosome (APC/C) (Ollendorff and Donoghue 1997). The  
94 APC/C is an E3 ubiquitin ligase required for activation of separase at the metaphase to anaphase  
95 transition and is regulated by phosphorylation (Kraft et al. 2003; Chang and Barford 2014;  
96 Musacchio 2015). The precise mechanism by which PPH-5 regulates separase is unknown, but  
97 these findings suggest that it may be an important regulator of the metaphase to anaphase  
98 transition.

99 One of the well-studied regulatory pathways of PPH-5 is its interaction with the  
100 molecular chaperone HSP-90. The crystal structure of auto-inhibited human phosphatase 5 (PP5)  
101 shows that access to the enzyme active site is blocked by a combination of the TPR domain and a  
102 C-terminal  $\alpha$ J-helix (Yang et al. 2005). HSP-90 binds the TPR domain of PPH-5 to release auto-

103 inhibition and promote phosphatase activity towards protein substrates (Haslbeck et al. 2015).  
104 HSP-90 consists of three highly conserved domains and binds its client proteins via its middle  
105 domain (MD), while it binds co-chaperones via its C-terminal domain (Schopf et al. 2017). The  
106 very C-terminal MEEVD motif is critical for HSP90 interaction with TPR domain containing co-  
107 chaperones like PP5. As a major protein chaperone, HSP-90 is known to bind multiple proteins  
108 (Haslbeck et al. 2013). Available HSP-90 mutants as well as RNAi in *C. elegans* cause penetrant  
109 pleiotropic phenotypes (Inoue et al. 2006; Gillan et al. 2009; Gaiser et al. 2011). To our  
110 knowledge, there is no evidence linking HSP-90 to regulation of separase in any system.

111 In this paper, we present the results of a genetic suppressor screen aimed at uncovering  
112 regulators of separase. We identified intragenic suppressors, *pph-5* mutants, a novel *hsp-90* allele  
113 and unknown alleles that fall into five complementation groups. These suppressors may provide  
114 important insight into separase regulation and function.

115

## MATERIALS AND METHODS

### 116 **Mutagenesis and Selection**

117 Strains were maintained as described (Brenner 1974). *sep-1(ax110)* screen: *sep-1(ax110)/hT2*  
118 [*bli-4(e937) let-?(q782) qIs48 (Pmyo-2::gfp; Ppes-10::gfp; Pges-1::gfp)*] (I,III) worms were  
119 synchronized by bleaching with hypochlorite and grown to L4. Mutagenesis was performed by  
120 incubating worms with 0.5mM ENU for 4 hours at 25° and recovering in 50ml of M9 overnight  
121 at 15°. 30 P<sub>0</sub>s were plated to 81 100mm plates, transferred to 25° and incubated. After one  
122 generation, 50 unbalanced (non-green, should be homozygous for *sep-1(ax110)*) F<sub>2</sub> progeny  
123 from each of the 81 100mm plates were moved onto 60mm OP50 plates and checked for fertility.  
124 From each non-green F<sub>3</sub> producing plate, at least 6 plates of non-green animals were cloned and  
125 genotyped. Candidate suppressed lines were confirmed to be homozygous for *sep-1(ax110)* and  
126 sequenced for mutations at the *pph-5* locus.

127 *sep-1(e2406)* screen: homozygous *sep-1(e2406)* worms were synchronized by bleaching with  
128 hypochlorite and grown to L4. Worms were mutagenized with 0.5mM ENU in M9 for 4 hours  
129 and recovered in 50ml of M9 for 1 hour at 15°. 100 mutagenized worms were moved to each of  
130 60 MYOB plates and incubated at 15°. P<sub>0</sub>s were moved to new plates daily. The number of F<sub>1</sub>  
131 worms on each plate were estimated and plates were grown for multiple generations at 15°.  
132 These plates were then chunked and incubated at 20° and allowed to produce offspring. Plates  
133 that yielded embryos were cloned and backcrossed to *sep-1(e2406)* for multiple generations.

### 134 **Identification of suppressor mutations**

135 Genotyping: *sep-1(ax110)*; primers (oASP-UTK-3 and oASP-UTK-4) were used to amplify a  
136 *sep-1* fragment by PCR. The PCR product was then digested with a restriction enzyme (SacII),  
137 which is introduced by the *sep-1(ax110)* mutation. The *sep-1(e2406)* allele was genotyped by

138 sequencing a PCR fragment amplified using a pair of primers (oASP-UTK-34 and oASP-UTK-  
139 29) and sequenced with oASP-UTK-7.

140 PCR and sequencing: PCR primers were used to amplify the locus of interest from worm  
141 lysates. PCR products were then gel purified and sequenced. Three PCR fragments of *sep-1*, five  
142 of *pph-5* and two of *hsp-90* were amplified, spanning across each gene. Primers used for PCR  
143 and sanger sequencing of *sep-1*, *pph-5* and *hsp-90* loci are listed in supplementary tables (Tables  
144 S2, S3 and S4).

#### 145 **Characterization of suppressed lines**

146 Hatching assay: four P<sub>0</sub> L4 larvae were placed in each of 35mm OP50 NGM plates and  
147 allowed to lay embryos for 24 hours at the experimental temperature (15°, 20° or room  
148 temperature). Worms were then moved to new plates and returned to temperature to continue  
149 laying embryos. The number of embryos and hatched animals on overnight plates was counted  
150 on each plate and plates were incubated for 24 hours. The following day, the number of  
151 unhatched embryos or hatched larvae was counted and % hatching was quantified.

152 RNAi feeding: Worms were moved onto NGM plates with ampicillin and isopropyl-b- D-  
153 thiogalactopyranoside which were seeded with HT115(DE3) bacteria carrying RNAi feeding  
154 constructs for 24 hours. Worms were then moved onto new RNAi feeding plates daily and  
155 hatching embryos were counted. Unless otherwise stated, five L1 stage worms per strain were  
156 fed at 20°. Animals were moved to new RNAi feeding plates after reaching the L4 stage, and  
157 hatching was quantified daily for 48 hours.

158 Western blot analysis: Worms were grown at 20° on 100mm OP50 seeded plates for one  
159 generation and collected by washing in M9 buffer. Each worm pellet was resuspended in 1xSDS  
160 loading buffer (2 $\mu$ l/mg of pellet) and heated in a microwave (4x20 sec with 1 min cooling).



161 Lysates were then centrifuged (15,000 x RCF, 10 min) and supernatant was transferred into new  
162 tubes. 10  $\mu$ l of worm lysate was then loaded per well and analyzed by standard western blot.  
163 SEP-1 was detected by using a polyclonal rabbit antibody ([Richie et al. 2011](#)) at a dilution of  
164 1:750. Secondary antibody used was anti-rabbit 700 from Li-Cor and quantified using the Image  
165 Studio software. Non-specific bands were used to normalize signals between lanes. All antibody  
166 incubations were done in the presence of 5% (w/v) non-fat milk.

167 Complementation tests: Twenty-five males generated using *him-5 RNAi* bacterial feeding for  
168 each strain were mated with five hermaphrodites on unseeded NGM plates and incubated at 20°  
169 for 24 hours. Mated worms were then moved to OP50 seeded 60mm plates and allowed to lay F<sub>1</sub>  
170 embryos at 15°. Once F<sub>1</sub> worms reach L4 stage and the presence of ~50% male animals was  
171 observed, indicative of successful mating, four L4 hermaphrodites in triplicate were moved to  
172 OP50 seeded 35mm NGM plates and incubated at 20°. Viability of F<sub>2</sub> embryos was determined.

### 173 **Reagent Availability**

174 All strains are available upon request.

175

## RESULTS AND DISCUSSION

### 176 Identification of suppressors

177 To identify genes that regulate separate function, we performed mutagenesis screens for  
178 suppressors of two separate mutants, *sep-1(ax110)* and *sep-1(e2406)* (Figure 1A). We first  
179 screened for suppressors of the non-conditional *sep-1(ax110)* mutant (Figure S1A) which  
180 introduces a point mutation in the protease domain of SEP-1(H738P) and is maternal effect  
181 embryonic lethal. We postulated that this separate allele might be differentially impaired relative  
182 to the temperature sensitive *sep-1(e2406)* allele, which introduces a mutation in the TPR-like  
183 domain (C450Y) and might be suppressed by a different set of mutations. This suppressor screen  
184 identified four independent suppressors of *sep-1(ax110)*, all of which were *pph-5* mutants  
185 (*erb1(S229L)*, *erb2(M380T)*, *erb3(L77P)* and *erb4(L77P)*) from 56,404 genomes screened  
186 (Figure 1B and Figure S1B). This is consistent with a previous finding that *sep-1(ax110)* is  
187 completely rescued by loss of *pph-5* (Richie et al. 2011). Therefore, we focused our efforts  
188 towards identifying suppressors of *sep-1(e2406)*.

189 The *sep-1(e2406)* mutation results in a temperature sensitive maternal effect embryonic  
190 lethality. When L4 animals are shifted to 20°, the lowest temperature at which lethality is fully  
191 penetrant, *sep-1(e2406)* hermaphrodites lay 100% dead embryos. *sep-1(e2406)* embryos are  
192 unable to perform cortical granule exocytosis and fail to build an eggshell when maintained at  
193 25° (Bembenek et al. 2007; Richie et al. 2011). We utilized an ENU mutagenesis approach to  
194 isolate suppressors of *sep-1(e2406)* that result in viable F3 progeny at the restrictive temperature  
195 of 20° (see Materials and Methods) (Figure 1A). This approach yielded a total of sixty-eight  
196 independent suppressor lines from a total of  $9.6 \times 10^5$  haploid genomes (as determined by  
197 counting the approximate number of mutagenized F1 progeny). Each suppressor line was cloned

198 and backcrossed with the original *sep-1(e2406)* line to reduce non-suppressing background  
199 mutations and homozygotes were isolated. A candidate gene sequencing approach was utilized to  
200 identify suppressor mutations within *sep-1*, *pph-5* and *hsp-90* (formerly known as *daf-21*) (see  
201 [Materials and Methods](#)). We also isolated six lines with novel unknown mutations belonging to  
202 at least four complementation groups.

### 203 **Intragenic suppressors of *sep-1(e2406)* are exclusively N-terminal**

204 There were fourteen independent suppressor lines identified as intragenic *sep-1(e2406)*  
205 suppressors. All intragenic *sep-1(e2406)* suppressors resulted in missense mutations within the  
206 N-terminal region of SEP-1 and none are found in the catalytic domain of the protein (Figure  
207 [2A](#)). Some mutations were identified from multiple independent lines. Interestingly, mutation in  
208 lysine 556 was identified in six lines.

209 The types of missense mutations observed include ones that increase the size of amino  
210 acid side chains while preserving charge (A64V, A392I, A471V and D541E). We also found  
211 mutations that remove charged side chains and introduce hydrophobic residues (T357I and  
212 N517I). The residue most frequently mutated was L556 and both changes we observed result in  
213 the introduction of aromatic side chains (L556F and L556H, Figure [2A](#), [S2](#)). It is also notable  
214 that L556F was previously identified as an intragenic *sep-1(e2406)* suppressor ([Richie et al.](#)  
215 [2011](#)). We find that multiple residues in the N-terminus can be changed to restore function to the  
216 *sep-1(e2406)* mutant and restore viability (Figure [2 B and C](#)).

217 One possible mechanism of suppression is that these mutations affect the stability of  
218 separase. To address this, we performed western blotting analysis of SEP-1 abundance in each of  
219 the suppressed lines. The separase protein is detectable in adult worms (Figure [2D](#)) showing that  
220 proteins carrying suppressor mutations are expressed. Quantification shows that the original

221 SEP-1(e2406) mutant protein is 40% as abundant as wild type SEP-1. The least effective  
222 rescuing mutation, *erb27* (V392I), is expressed at about twice the level of wild type separase.  
223 The three most effective rescuing mutations (*erb17* (N517I), *erb10* (L556H) and *erb5* (L556F))  
224 have varying levels of expression. SEP-1(*erb5*) is 2.5-fold as abundant as wild type whereas  
225 SEP-1(*erb17*) and SEP-1(*erb10*) are expressed at 1.5-fold of wild type. The least abundantly  
226 expressed mutant, SEP-1(*erb16*) (*T357I*), is not the least effective suppressor. No clear  
227 correlation is observed between protein abundance and rescuing ability, suggesting that these  
228 mutations do not simply affect protein levels, but may affect separase structure and function.

229 To gain more insight into these mutations, we mapped mutated suppressor residues onto  
230 the recently published Cryo-EM structure of SEP-1 in complex with its pseudosubstrate  
231 inhibitory chaperone; IFY-1 (securin) (PDB 5MZ6, [Boland et al. 2017](#)). This analysis reveals  
232 that there is no clustering of mutated residues to any specific surface in the TPR like domain of  
233 the N-terminus (Figure 2E). C450, the residue mutated in SEP-1(e2406), is at the edge of helix  
234 16 and part of an unstructured loop containing about sixty amino acids between helix 15 and 16  
235 of the TPR-like domain. The effects of C450Y mutation on the structure of the TPR-like domain  
236 have not been elucidated, but there is a potential that introducing a large aromatic residue on this  
237 solvent exposed loop may be unfavorable and could lead to a structural rearrangement of the  
238 SEP-1 N-terminal domain. The residues mutated in suppressed lines are found on helices not  
239 near C450, facing the interior of the protein and are likely involved in intramolecular interactions  
240 (Figure S2). These mutations have the potential of introducing new intramolecular interactions  
241 leading to improved structural stability of the SEP-1 TPR-like domain that may be disrupted in  
242 SEP-1(e2406). It is important to consider that the separase Cryo-EM structure represents a

243 securin-bound fold of the enzyme, which is inactive. The active conformation of separase might  
244 bring these key residues into more obvious functionally relevant orientations.

### 245 ***pph-5* mutants are most frequently identified *sep-1(e2406)* suppressors**

246 The majority of *sep-1(e2406)* suppressors identified from our analysis are mutations in  
247 the protein phosphatase, *pph-5*. The types of mutations identified include premature stop codons  
248 (12 alleles), splice site mutations (6 alleles), as well as amino acid substitutions (29 alleles).

249 Missense *pph-5* suppressing mutations span the full length of the protein, altering both the TPR  
250 as well as the phosphatase domain. Excluding mutations that introduce a premature stop codon,  
251 our screen has identified twenty-five unique amino acid substitutions across the protein (Figure  
252 [3A](#)). Missense suppressor mutations occur both within the TPR domain and the phosphatase  
253 domain of PPH-5, suggesting that both domains are required for PPH-5 regulation of separase.  
254 The capacity of these mutations to rescue *sep-1(e2406)* varies, as assayed by the proportion of  
255 embryos able to hatch at the restrictive temperature (Figure [3 B and C](#)). Strong RNAi  
256 knockdown of *pph-5* (*pph-5 RNAi*) in these suppressed lines also results in improvement of  
257 suppression (Table [1](#)) suggesting that they are reduction-of-function mutations.

258 It has been shown that *pph-5* mutants do not suppress *sep-1(e2406)* by bypassing  
259 separase requirement ([Richie et al. 2011](#)) as RNAi knockdown of *sep-1* still results in lethality in  
260 suppressed lines. It is likely that the suppressors we have identified are *pph-5* reduction of  
261 function mutants and restore viability in a similar manner as previously identified *pph-5* mutants.  
262 Our data do not preclude the possibility that *pph-5* acts in a separase independent pathway to  
263 restore viability to *sep-1(e2406)* animals. We favor our proposed model because mutations in  
264 *pph-5* have been demonstrated to restore mutant separase localization ([Richie et al. 2011](#)). One  
265 suppressor mutation in *pph-5* (L77P) was independently identified in both screens as a

266 suppressor of conditional (*sep-1(e2406)*) and non-conditional (*sep-1(ax110)*) separase mutants.  
267 This extensive collection of *pph-5* mutants provides a valuable tool for structure-function as well  
268 as genetic analysis of this phosphatase.

### 269 **HSP-90 suppressor reveals novel regulator of separase**

270 The biochemical evidence connecting PPH-5 with HSP-90 ([Haslbeck et al. 2015](#))  
271 prompted us to test if any of the suppressors were *hsp-90* mutations. We sequenced the *hsp-90*  
272 locus of the remaining suppressed lines that did not carry any suppressing intragenic or *pph-5*  
273 mutations. We found that *erb71* has a single missense mutation that changes methionine 661 into  
274 lysine (Figure 4A) that has an intermediate ability to restore hatching to 31% (Table 2). When  
275 isolated from *sep-1(e2406)*, the *hsp-90(erb71)* allele has minimal effect on embryonic survival at  
276 20° (84% hatching) which suggests that the essential functions of HSP-90 are minimally affected  
277 (Figure 4B). The rescue observed with *pph-5(RNAi)* is greater than the 31% survival observed in  
278 *hsp-90(erb71)*. This suggests that either the M661L mutation does not completely disrupt the  
279 PPH-5 activating functions of HSP-90 or that PPH-5 can still be active without HSP-90.  
280 Consistent with this, we observed improved survival (92.9% hatching) when *pph-5(RNAi)* was  
281 performed in a *sep-1(e2406); hsp-90(erb71)* animal (Table 2). The identification of a HSP-90  
282 allele that can suppress a temperature sensitive separase mutation is consistent with the  
283 hypothesis that HSP-90 acts via its regulation of PPH-5. Our data, however, do not exclude the  
284 possibility that HSP-90 directly regulates separase independent of PPH-5.

285 Combining *hsp-90(erb71)* with *pph-5(RNAi)* has little effect on embryonic survival,  
286 compared to the effects of *erb71* alone (84% vs 86% hatching) in an otherwise wild type  
287 background. No significant changes in hatching were observed when *hsp-90(erb71)* was  
288 combined with *pph-5(tm2979)*. *pph-5(tm2979)* is an in-frame deletion that removes 55 amino

289 acids from the PPH-5 TPR domain and potently suppresses *sep-1(e2406)* and *sep-1(ax110)*  
290 (Richie et al. 2011). These observations demonstrate that *pph-5* function is not critical, even in a  
291 mutant *hsp-90(erb71)* background, for the essential functions of HSP-90. Taken together, these  
292 observations support the hypothesis that *hsp-90(erb71)* does not result in a general loss in HSP-  
293 90 chaperone activity.

294 It is interesting to note that the mutation in HSP-90(erb71) (M661K) is found just N-  
295 terminal to the HSP-90 MEEVD motif, which is critical for HSP-90 to activate PPH-5 (Haslbeck  
296 et al. 2015). There is biochemical evidence that the PPH-5/HSP-90 interaction involves  
297 additional HSP-90 domains beyond the MEEVD motif. Activation of PPH-5 phosphatase by a  
298 peptide containing the MEEVD motif is less than that observed for full-length HSP-90 (Haslbeck  
299 et al. 2015). Crosslinking experiments also suggest additional contacts between HSP-90 and  
300 PPH-5. The corresponding residue mutated in *HSP-90(erb71)* in human HSP90 (M813) is part of  
301 the dimerization interface of two Hsp90 molecules near the site of TPR integrating MEEVD  
302 domain; as observed in a cryo-EM structure (PDB 5FWP, Verba et al. 2016). This residue might  
303 alter the ability of the MEEVD peptide to bind to the TPR domain of PPH-5 by altering HSP-90  
304 C-terminal structure. Therefore, an analogous mutation in other organisms such as human cells  
305 may be useful for studies of the HSP90-PP5 pathway. We propose a model for the regulation of  
306 separase in which *pph-5* is a negative regulator of separase and PPH-5 activity is positively  
307 regulated by interactions with HSP-90 (Figure 4 C). These new alleles of *hsp-90* and *pph-5*  
308 provide important tools for future dissection of this pathway.

### 309 **Novel *sep-1(e2406)* suppressors belong to multiple complementation groups**

310 Our suppressor screen identified six lines without suppressor mutations in the three  
311 genes we sequenced (*sep-1*, *pph-5* and *hsp-90*). These suppressed lines have varying degrees of

312 hatching recovery at the restrictive temperature (Figure 5 A). To determine the number of loci  
313 represented by this group of alleles, we performed pairwise complementation tests. The hatching  
314 efficiency of broods laid by F1 cross progeny between two homozygous suppressed lines was  
315 monitored at 20°. As presented in Figure 5 B, these suppressors belong to four, possibly five,  
316 complementation groups. Two lines, *sep-1(e2406); erb23* and *sep-1(e2406); erb24* do not  
317 complement and their cross progeny demonstrate an intermediate embryonic lethality as  
318 compared to the parents. Another mutant, *sep-1(e2406); erb66* mutation appears to be dominant  
319 over other suppressors, except *erb67*, and cannot be assigned to a complementation group.  
320 Finally, *erb37*, *erb60* and *erb67* do not result in suppression when crossed with other mutants  
321 and are likely mutations in three different genes. These observations provide an exciting  
322 opportunity to identify novel regulators of separase.

### 323 **Conclusion**

324 By undertaking this extensive suppressor screen, we set out to identify separase  
325 regulators. Our results reveal that the phosphatase, *pph-5*, is a suppressor of *sep-1(e2406)*  
326 lethality. The results of our genetic screen highlight the importance of the *pph-5* regulatory  
327 pathway. The mechanism by which *pph-5* regulates separase during cytokinesis will be an  
328 important focus of future studies. Identifying substrates of PPH-5 that become  
329 hyperphosphorylated in a *pph-5* mutant may elucidate this mechanism as well as any additional  
330 roles PPH-5 might play during mitosis. We have found that *hsp-90* also functions, likely via its  
331 regulation of *pph-5*, as a separase regulator. The sole *hsp-90* suppressor we identified may be a  
332 rare hypomorphic mutant whose PPH-5 activating role is selectively reduced without  
333 compromising its other critical chaperone functions. Given the high degree of conservation of  
334 *pph-5* and *hsp-90*, we expect our observations will be applicable to separase function in other



335 systems as well. We were also able to identify novel intragenic suppressors, all of which are  
336 missense mutations in the N-terminal TPR-like domain of SEP-1, providing insight into this  
337 poorly characterized domain. TPR domains mediate protein-protein interactions and these  
338 residues may be involved in mediating interactions with separase binding partners required for  
339 its function. We have additionally isolated lines that carry mutations belonging to at least four  
340 complementation groups, giving us the opportunity to more extensively understand separase  
341 regulation. We will pursue a whole genome sequencing approach to identify these mutations.  
342 This study demonstrates the power of genetics in understanding separase function and regulation.

343

## *ACKNOWLEDGMENTS*

344           We would like to thank Aude Peden for performing the ENU screen and isolating  
345 suppressors. We would like to thank Chris Turpin for helping with the screen and discussion of  
346 the manuscript. We would like to thank Andy Golden from the National Institute of Diabetes &  
347 Digestive & Kidney Disease at the National Institutes of Health for his scientific discussion and  
348 guidance. We would also like to thank Kevin O'Connell and Bruce McKee for providing critical  
349 feedback on the manuscript. We especially thank Wormbase and the Caenorhabditis Genetics  
350 Center (CGC). WormBase is supported by grant U41 HG002223 from the National Human  
351 Genome Research Institute at the US National Institutes of Health, the UK Medical Research  
352 Council and the UK Biotechnology and Biological Sciences Research Council. The CGC (St.  
353 Paul, MN), is funded by the National Institutes of Health Office of Research Infrastructure  
354 Programs (P40 OD010440). This work was funded by startup funds from UT Knoxville and by  
355 NIH R01 GM114471.

356  
357  
358  
359  
360  
361  
362  
363  
364  
365  
366  
367  
368  
369  
370  
371  
372  
373  
374  
375  
376  
377

## LITERATURE CITED

Bacac, M., C. Fusco, A. Planche, J. Santodomingo, N. Demarex, et al., 2011 Securin and Separase Modulate Membrane Traffic by Affecting Endosomal Acidification. *Traffic* **12**: 615–626.

Baskerville, C., M. Segal, and S. I. Reed, 2008 The protease activity of yeast separase (Esp1) is required for anaphase spindle elongation independently of its role in cleavage of cohesin. *Genetics* **178**: 2361–2372.

Bembenek, J. N., C. T. Richie, J. M. Squirrell, J. M. Campbell, K. W. Eliceiri, et al., 2007 Cortical granule exocytosis in *C. elegans* is regulated by cell cycle components including separase. *Development* **134**: 3837–3848.

Bembenek, J. N., J. G. White, and Y. Zheng, 2010 A role for separase in the regulation of RAB-11-positive vesicles at the cleavage furrow and midbody. *Curr. Biol.* **20**: 259–64.

Boland, A. et al., 2017 Cryo-EM structure of a metazoan separase–securin complex at near-atomic resolution. *Nat. Struct. Mol. Biol.* 1–7

Brenner, S., 1974 The genetics of *Caenorhabditis elegans*. *Genetics* **77**: 71–94.

Chang, L. and D. Barford, 2014 Insights into the anaphase promoting complex: a molecular machine that regulates mitosis. *Curr. Opin. Struct. Biol.* **29**: 1–9.

Chen, M. S., A. M. Silverstein, W. B. Pratt, and M. Chinkers, 1996 The tetratricopeptide repeat domain of protein phosphatase 5 mediates binding to glucocorticoid receptor heterocomplexes and acts as a dominant negative mutant. *J. Biol. Chem.* **271**: 32315–20.

Gaiser, A. M., C. J. O. Kaiser, V. Haslbeck, and K. Richter, 2011 Downregulation of the Hsp90 System Causes Defects in Muscle Cells of *Caenorhabditis Elegans*. *PLoS One* **6**.

378 Gillan, V., K. Maitland, G. McCormack, N. A. I. I. N. Him, and E. Devaney, 2009 Functional  
379 genomics of hsp-90 in parasitic and free-living nematodes. *Int. J. Parasitol.* **39**: 1071–1081.

380 Gorr, I. H., D. Boos, and O. Stemmann, 2005 Mutual inhibition of separase and Cdk1 by two-  
381 step complex formation. *Mol. Cell* **19**: 135–141.

382 Haslbeck, V., J. M. Eckl, A. Drazic, D. a. Rutz, O. R. Lorenz, et al., 2015 The activity of protein  
383 phosphatase 5 towards native clients is modulated by the middle- and C-terminal domains of  
384 Hsp90. *Sci. Rep.* **5**: 17058.

385 Haslbeck, V., J. M. Eckl, C. J. O. Kaiser, K. Papsdorf, M. Hessling, et al., 2013 Chaperone-  
386 interacting TPR proteins in *Caenorhabditis elegans*. *J. Mol. Biol.* **425**: 2922–2939.

387 Hauf, S., Waizenegger, I. C. & Peters, J. M. Cohesin cleavage by separase required for anaphase  
388 and cytokinesis in human cells. *Science* **293**, 1320–3 (2001).

389 Inoue, T., K. Hirata, Y. Kuwana, M. Fujita, J. Miwa, et al., 2006 Cell cycle control by daf-  
390 21/Hsp90 at the first meiotic prophase/metaphase boundary during oogenesis in  
391 *Caenorhabditis elegans*. *Dev. Growth Differ.* **48**: 25–32.

392 Kraft, C., F. Herzog, C. Gieffers, K. Mechtler, A. Hagting, et al., 2003 Mitotic regulation of the  
393 human anaphase-promoting complex by phosphorylation. *EMBO J.* **22**: 6598–609.

394 Moschou, P. N., E. I. Savenkov, E. A. Minina, K. Fukada, S. H. Reza, et al., 2016 EXTRA  
395 SPINDLE POLES (Separase) controls anisotropic cell expansion in Norway spruce (*Picea*  
396 *abies*) embryos independently of its role in anaphase progression. *New Phytol.* **212**: 232–243.

397 Musacchio, A., 2015 The Molecular Biology of Spindle Assembly Checkpoint Signaling  
398 Dynamics. *Curr. Biol.* **25**: R1002–R1018.

399 Nasmyth, K. A. Segregating sister genomes: the molecular biology of chromosome separation.  
400 *Science* **297**, 559–65 (2002).

- 401 Nasmyth, K. & Haering, C. H. Cohesin: Its Roles and Mechanisms. *Annu. Rev. Genet.* **43**, 525–  
402 558 (2009).
- 403 Ollendorff, V. and D. J. Donoghue, 1997 The serine/threonine phosphatase PP5 interacts with  
404 CDC16 and CDC27, two tetratricopeptide repeat-containing subunits of the anaphase  
405 promoting complex. *J. Biol. Chem.* **272**: 32011–32018.
- 406 Olson, S. K., G. Greenan, A. Desai, T. Müller-Reichert, and K. Oegema, 2012 Hierarchical  
407 assembly of the eggshell and permeability barrier in *C. Elegans*. *J. Cell Biol.* **198**: 731–748.
- 408 Peters, J. M., A. Tedeschi, and J. Schmitz, 2008 The cohesin complex and its roles in  
409 chromosome biology. *Genes Dev.* **22**: 3089–3114.
- 410 Richie, C. T., J. N. Bembenek, B. Chestnut, T. Furuta, J. M. Schumacher, et al., 2011 Protein  
411 phosphatase 5 is a negative regulator of separase function during cortical granule exocytosis  
412 in *C. elegans*. *J. Cell Sci.* **124**: 2903–13.
- 413 Schopf, F. H., Biebl, M. M. & Buchner, J. The HSP90 chaperone machinery. *Nat. Publ. Gr.* **18**,  
414 345–360 (2017).
- 415 Siomos, M. F., A. Badrinath, P. Pasierbek, D. Livingstone, J. White, et al., 2001 Separase is  
416 required for chromosome segregation during meiosis I in *Caenorhabditis elegans*. *Curr. Biol.*  
417 **11**: 1825– 1835.
- 418 Stein, K. K. and A. Golden, 2015 The *C. elegans* eggshell. *Wormbook* pp. 1–35.
- 419 Sullivan, M., C. Lehane, and F. Uhlmann, 2001 Orchestrating anaphase and mitotic exit:  
420 separase cleavage and localization of Slk19. *Nat. Cell Biol.* **3**: 771–7.
- 421 Sullivan, M. and F. Uhlmann, 2003 A non-proteolytic function of separase links the onset of  
422 anaphase to mitotic exit. *Nat. Cell Biol.* **5**: 249–54.

- 423 Uhlmann, F., Wernic, D., Poupart, M. a, Koonin, E. V & Nasmyth, K. A. Cleavage of cohesin by  
424 the CD clan protease separin triggers anaphase in yeast. *Cell* **103**, 375–86 (2000).
- 425 Verba, K. A. et al. Atomic structure of Hsp90-Cdc37-Cdk4 reveals that Hsp90 traps and  
426 stabilizes an unfolded kinase. *Science* (80). **352**, 1542–1547 (2016).
- 427 Williams, B. D., B. Schrank, C. Huynh, R. Shownkeent, and R. H. Waterston, 1992 A Genetic  
428 Mapping System in *Caenorhabditis elegans* Based on Polymorphic Sequence-Tagged Sites.  
429 *Genetics* **131**: 609–624.
- 430 Yang, J., S. M. Roe, M. J. Cliff, M. a. Williams, J. E. Ladbury, et al., 2005 Molecular basis for  
431 TPR domain-mediated regulation of protein phosphatase 5. *EMBO J.* **24**: 1–10.

432

FIGURES

433

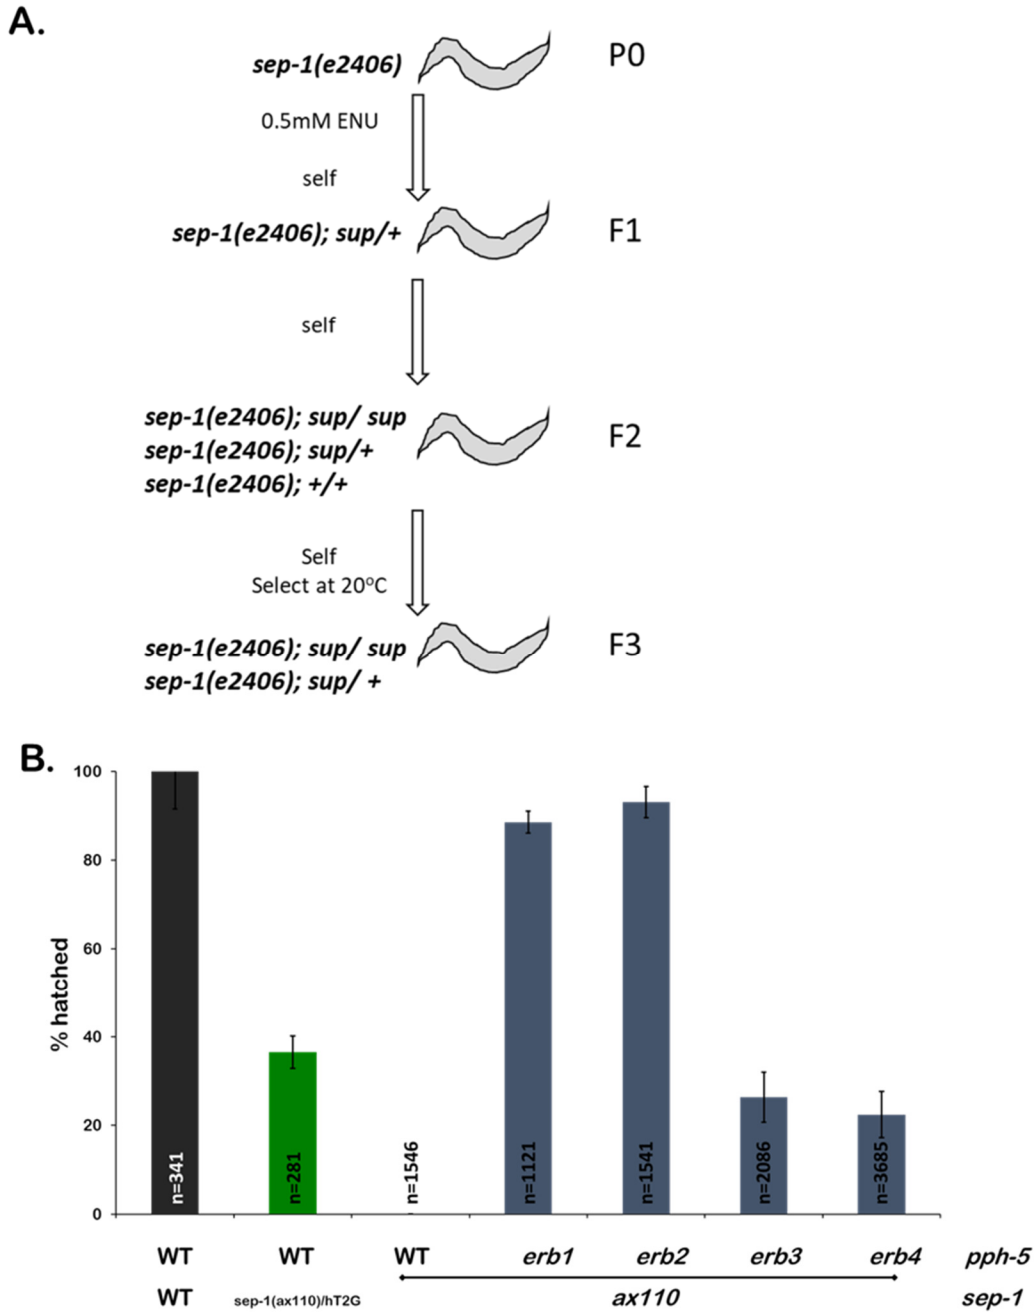

434

435 **Figure 1 Isolation of suppressors of *sep-1(ax110)* and *sep-1(e2406)***

436 **A.** Schematic for the isolation of lethality suppressing mutants in the temperature sensitive *sep-*

437 *1(e2406)* background via ENU mutagenesis. **B.** Mutations in *pph-5* rescue non-conditional *sep-*

438 *I(ax110)* mutants. *sep-1(ax110)* homozygotes carrying mutations in the phosphatase domain,  
439 *erb1* (S229L) and *erb2* (M380T), of PPH-5 have lower embryonic lethality relative to those  
440 carrying mutations in the TPR domain *erb3/4* (L77P) (n=number of embryos).



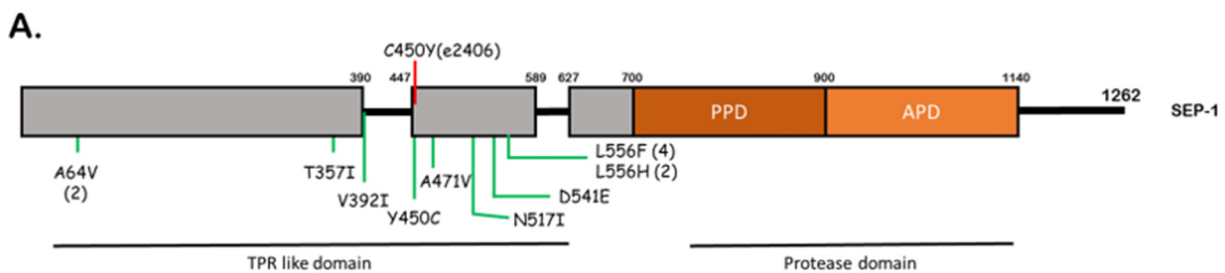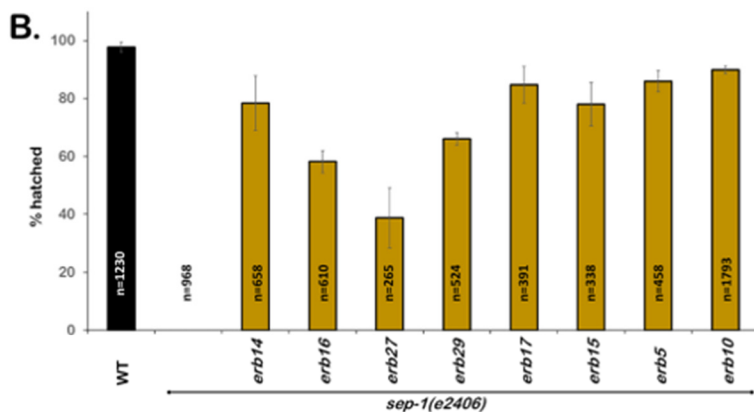

**C.**

| Genotype                  | SEP-1 Sequence |
|---------------------------|----------------|
| <i>sep-1(e2406)</i>       | C450Y          |
| <i>sep-1(e2406 erb14)</i> | C450Y A64V     |
| <i>sep-1(e2406 erb16)</i> | C450Y T357I    |
| <i>sep-1(e2406 erb27)</i> | C450Y V392I    |
| <i>sep-1(e2406 erb29)</i> | C450Y A471V    |
| <i>sep-1(e2406 erb17)</i> | C450Y N517I    |
| <i>sep-1(e2406 erb12)</i> | C450Y D541E    |
| <i>sep-1(e2406 erb10)</i> | C450Y L556H    |
| <i>sep-1(e2406 erb5)</i>  | C450Y L556F    |

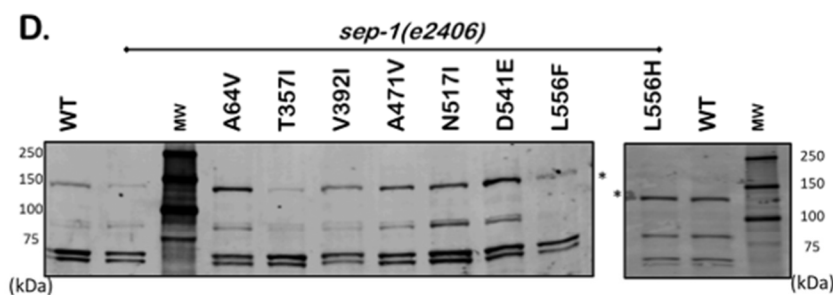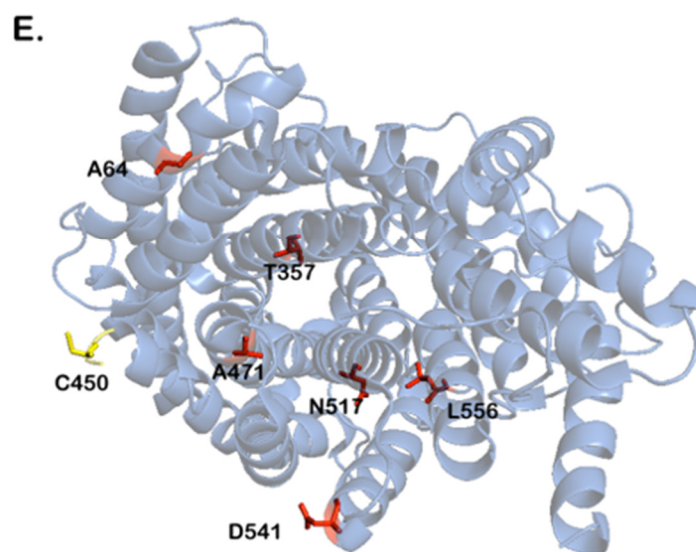

442 **Figure 2 Intragenic mutations suppress *sep-1(e2406)***

443 **A.** Protein diagram illustrating suppressing alleles of SEP-1. The causative *e2406* mutation  
444 (C450Y) is depicted with a red line. Novel suppressor mutations are in green on the protein  
445 diagram and are exclusively in the N-terminal TPR-like domain of the protein. Numbers in  
446 parentheses following a mutation indicate the number of times each suppressor was identified. **B.**  
447 Embryonic lethality assays demonstrate that each suppressing mutation restores viability to *sep-*  
448 *1(e2406)* worms at 20° (n=number of embryos). **C.** Table listing gene mutations and the  
449 resulting missense mutations in SEP-1. **D.** SEP-1 is detectable by western blot in animals  
450 carrying *sep-1(e2406)* suppressing mutations. Asterisk indicates SEP-1 (144KDa). **E.** Cryo-EM  
451 structure (PDB 5MZ6) illustrating the N-terminal TPR like domain of SEP-1. The residue  
452 mutated in *sep-1(e2406)* (C450) is shown in yellow and suppressor mutations are illustrated in  
453 red. Mapping of mutated residues onto the structure illustrates that they are distributed  
454 throughout the N-terminus.

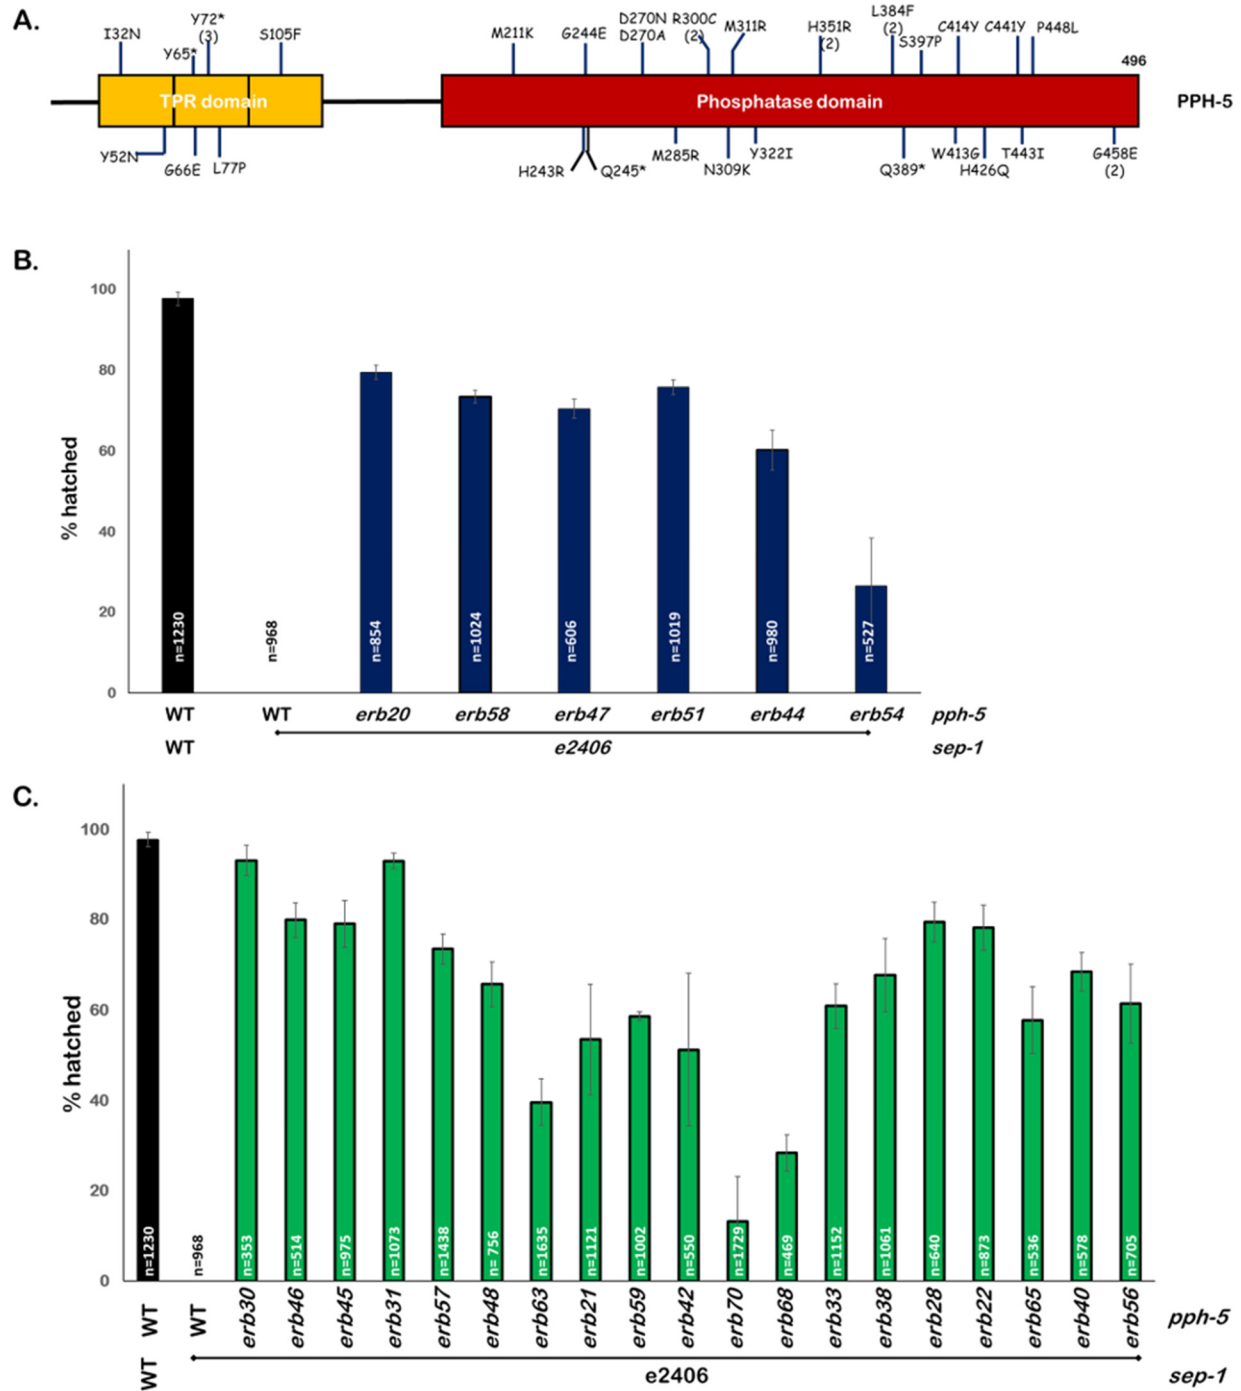

455  
456 **Figure 3 Mutations in *pph-5* are the most frequently identified *sep-1(e2406)* suppressors.**

457 **A.** Protein diagram illustrating *pph-5* alleles suppressing *sep-1(e2406)*. These missense  
458 mutations span across PPH-5. Numbers in parentheses following a mutation indicate the number  
459 of times each suppressor was identified. This diagram does not depict splice site variants or

460 frameshift mutations. **B.** Embryonic lethality of *sep-1(e2406)* is rescued by missense mutations  
461 in the TPR domain of PPH-5, which might affect interactions with PPH-5 binding partners. **C.**  
462 Embryonic lethality of *sep-1(e2406)* is rescued by missense mutations in the phosphatase domain  
463 of PPH-5, which might affect catalytic activity (n=number of embryos).

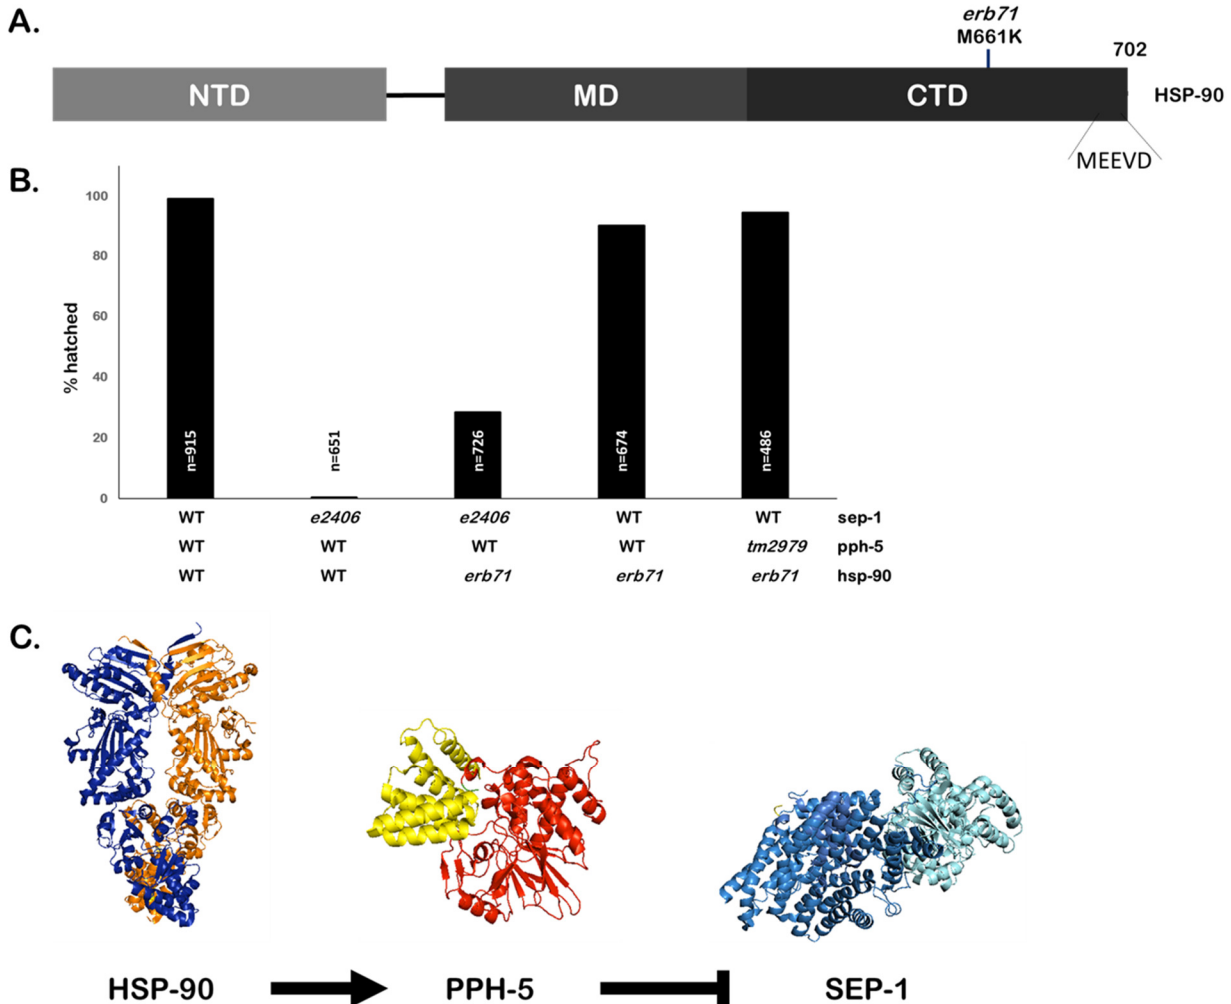

464

465

**Figure 4 Mutation in the molecular chaperone *hsp-90* suppresses *sep-1(e2406)*.**

466

**A.** Protein diagram of HSP-90. The *erb71* mutation results in a missense mutation at the C-

467

terminal end of the protein chaperone HSP-90 (M661K), separated by 36 residues from the C-

468

terminal most MEEVD motif. HSP-90 protein domains are also illustrated (NTD, amino-

469

terminal domain; MD, middle domain; CTD, carboxy-terminal domain; MEEVD, Met-Glu-Glu-

470

Val-Asp motif) **B.** The *hsp-90(erb71)* mutant has minimal effect on hatching when present in an

471

otherwise wild type background. Embryonic lethality is not reduced when *hsp-90(erb71)* is

472

combined with a *pph-5* loss of function mutant (n=number of embryos). **C.** Model for separase

473

regulatory pathway: HSP-90 activates PPH-5 to negatively regulate separase function. Loss of

474 this negative regulation suppresses *sep-1(e2406)*. (PDB structures modified from 5MZ6 (SEP-1),  
475 4JA9 (PPH-5) and 5FWP (HSP-90)).

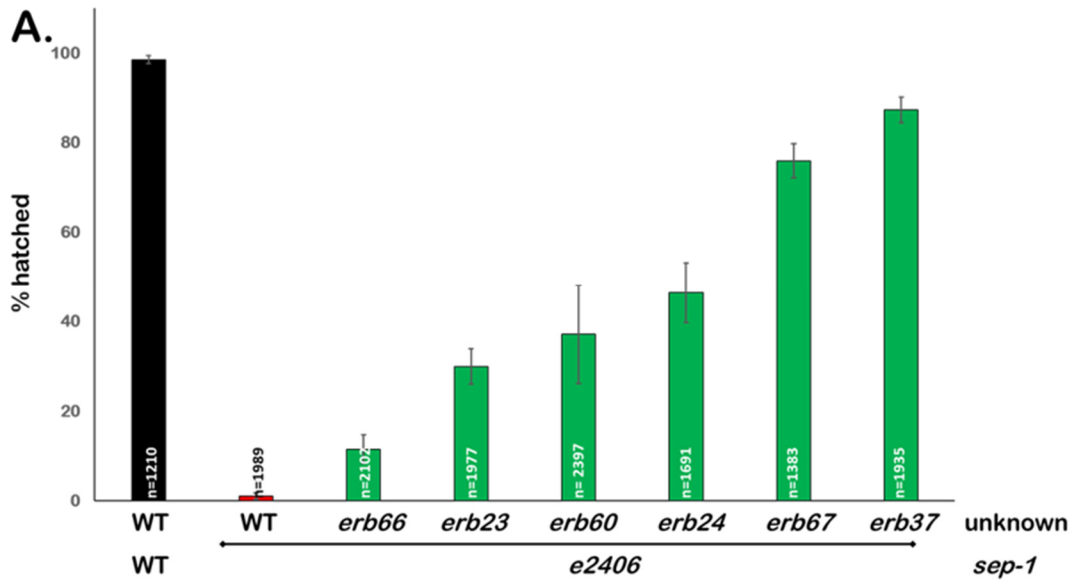

**B.**

|                     |              | <i>sep-1(e2406)</i>   |                       |                       |                       |                       |                       |
|---------------------|--------------|-----------------------|-----------------------|-----------------------|-----------------------|-----------------------|-----------------------|
|                     |              | <i>erb23</i><br>(29%) | <i>erb24</i><br>(46%) | <i>erb37</i><br>(87%) | <i>erb60</i><br>(37%) | <i>erb66</i><br>(11%) | <i>erb67</i><br>(87%) |
| <i>sep-1(e2406)</i> | <i>erb23</i> |                       | 33%<br>(±4%)<br>FTC   | C                     | C                     | 25%<br>(±2%)          | C                     |
|                     | <i>erb24</i> |                       |                       | C                     | C                     | 85%<br>(±1%)          | C                     |
|                     | <i>erb37</i> |                       |                       |                       | C                     | 73%<br>(±9%)          | C                     |
|                     | <i>erb60</i> |                       |                       |                       |                       | 35%<br>(±3%)          | C                     |
|                     | <i>erb66</i> |                       |                       |                       |                       |                       | C                     |

476

477 **Figure 5 Novel suppressors of *sep-1(e2406)* belong to multiple complementation groups**

478 **A.** Strains carrying novel *sep-1(e2406)* suppressors result in varied rescue of embryonic lethality

479 (n=number of embryos). **B.** Complementation assay based on survival of F2 embryos of a cross

480 between strains carrying novel *sep-1(e2406)* suppressors indicates these suppressors belong to  
481 multiple complementation groups. Numbers below each parent strain or in a box representing a  
482 cross progeny indicate the percent of embryos that hatch at the restrictive temperature of 20°.  
483 The numbers in parenthesis are standard deviations for three replicate hatching assays; C =  
484 Complements, FTC = Failure To Complement.



485 **TABLES**

486 **Table 1 Reduction of *pph-5* by RNAi mediated knockdown results in improved hatching**

487 RNAi knockdown of *pph-5* by feeding results in improved hatching efficiency in worms carrying

488 *pph-5* mutations that suppress *sep-1(e2406)* lethality at the restrictive temperature of 20°.

489

| <i>sep-1</i>         | <i>pph-5</i>         | <i>pph-5</i> RNAi |            | <i>No RNAi</i> |
|----------------------|----------------------|-------------------|------------|----------------|
|                      |                      | Total embryo      | % hatching | % hatching     |
| WT                   | WT                   | 512               | 98.1       | 97.6           |
| <i>e2406</i>         | WT                   | 578               | 72.8       | 0.0            |
|                      | <i>erb13</i> (Y65*)  | 323               | 88.9       | 79.4           |
|                      | <i>erb58</i> (I32N)  | 255               | 98.0       | 73.3           |
|                      | <i>erb47</i> (Y52H)  | 235               | 73.5       | 70.4           |
|                      | <i>erb51</i> (G66E)  | 589               | 77.1       | 75.7           |
|                      | <i>erb44</i> (L77P)  | 226               | 95.1       | 60.2           |
|                      | <i>erb54</i> (S105F) | 298               | 33.9       | 26.3           |
|                      | <i>erb30</i> (M211K) | 113               | 94.7       | 92.9           |
|                      | <i>erb46</i> (H243R) | 215               | 85.1       | 79.8           |
|                      | <i>erb45</i> (G244E) | 604               | 78.3       | 78.9           |
|                      | <i>erb31</i> (D270A) | 320               | 94.7       | 92.8           |
|                      | <i>erb57</i> (D270N) | 434               | 97         | 73.4           |
|                      | <i>erb48</i> (M285R) | 325               | 91.1       | 65.6           |
|                      | <i>erb63</i> (R300C) | 322               | 75.5       | 39.6           |
|                      | <i>erb21</i> (N309K) | 351               | 95.4       | 53.4           |
|                      | <i>erb59</i> (M311R) | 378               | 65.5       | 58.6           |
|                      | <i>erb42</i> (Y322I) | 270               | 79.3       | 51.1           |
|                      | <i>erb72</i> (H351R) | 163               | 77.6       | 13.1           |
|                      | <i>erb68</i> (S397P) | 292               | 27.3       | 28.2           |
|                      | <i>erb33</i> (W413G) | 386               | 84.5       | 60.8           |
| <i>erb38</i> (C414Y) | 255                  | 76.5              | 67.7       |                |
| <i>erb28</i> (H426Q) | 399                  | 95.2              | 79.3       |                |
| <i>erb22</i> (C441Y) | 374                  | 79.1              | 78.1       |                |
| <i>erb65</i> (T443I) | 399                  | 84.4              | 57.7       |                |
| <i>erb40</i> (P448L) | 109                  | 74.3              | 68.4       |                |
| <i>erb52</i> (G458E) | 282                  | 78.0              | 61.3       |                |

490

491

492 **Table 2 RNAi mediated knockdown of *pph-5* in *hsp-90(erb71)* worms**

493 The genetic interaction between *pph-5* and *hsp-90* was investigated by using RNAi mediated  
494 knockdown of *pph-5*. Reduction of PPH-5 in a worm carrying a *sep-1(e2406)* rescuing *hsp-90*  
495 mutation results in reduced embryonic lethality at the restrictive temperature (20°C). However,  
496 *pph-5(RNAi)* has little effect on embryonic lethality of *hsp-90(erb71)*.

497

| Strain                                          | Total embryos | % hatching |
|-------------------------------------------------|---------------|------------|
| N2                                              | 512           | 98.4       |
| N2, <i>pph-5(RNAi)</i>                          | 352           | 97.8       |
| <i>sep-1(e2406)</i>                             | 223           | 0          |
| <i>sep-1(e2406); pph-5(RNAi)</i>                | 340           | 71.1       |
| <i>sep-1(e2406); hsp-90(erb71)</i>              | 181           | 30.9       |
| <i>sep-1(e2406); hsp-90(erb71); pph-5(RNAi)</i> | 157           | 92.9       |
| <i>hsp-90(erb71)</i>                            | 148           | 84.4       |
| <i>hsp-90(erb71); pph-5(RNAi)</i>               | 186           | 86.5       |

498
